# Supplementary material
Source: MDPI journal article supplement (https://www.mdpi.com/2674-0583/2/1/5)
Supplement: s1 [file s1]

# **Supplementary File S1**

## **Pangenome-Scale Mathematical Modelling of ANAMMOX Bacteria Metabolism**

**Roman G. Bielski and M. Ahsanul Islam**

Department of Chemical Engineering, Loughborough University, Leicestershire,

LE11 3TU, England, United Kingdom

Author emails: [R.G.Bielski@lboro.ac.uk](mailto:R.G.Bielski@lboro.ac.uk) and [M.Islam@lboro.ac.uk](mailto:M.Islam@lboro.ac.uk)

## Table of Contents

|                                                                                                                                                                                                                               |    |
|-------------------------------------------------------------------------------------------------------------------------------------------------------------------------------------------------------------------------------|----|
| List of Figures .....                                                                                                                                                                                                         | 2  |
| Model Details .....                                                                                                                                                                                                           | 3  |
| Biomass Objective Function .....                                                                                                                                                                                              | 4  |
| Thermodynamic Considerations .....                                                                                                                                                                                            | 7  |
| Gap Filling.....                                                                                                                                                                                                              | 8  |
| Nucleic Acids.....                                                                                                                                                                                                            | 11 |
| Ladderanes.....                                                                                                                                                                                                               | 11 |
| Cell Wall Components .....                                                                                                                                                                                                    | 11 |
| Calculation of <i>Ca. Kuenenia stuttgartiensis</i> Cell Composition.....                                                                                                                                                      | 11 |
| Electron Transport chain.....                                                                                                                                                                                                 | 12 |
| Calculation of Maximum Energy Transfer Efficiency (ATP/e <sup>-</sup> ) and Proton Translocation<br>Stoichiometry (H <sup>+</sup> /e <sup>-</sup> ratio) of <i>Ca. Kuenenia Stuttgartiensis</i> Electron Transport Chain..... | 12 |
| Calculation of GAM and NGAM .....                                                                                                                                                                                             | 13 |
| iRB399 Biomass Equation .....                                                                                                                                                                                                 | 14 |
| Bibliography.....                                                                                                                                                                                                             | 14 |

## List of Figures

|                                                                                                                                                                                       |          |
|---------------------------------------------------------------------------------------------------------------------------------------------------------------------------------------|----------|
| <b>Table S1:General features of iRB399 .....</b>                                                                                                                                      | <b>3</b> |
| <b>Table S2:MEMOTE[1] report generated from iRB399.....</b>                                                                                                                           | <b>4</b> |
| <b>Table S3:macromolecular composition of the biomass objective function in iRB399.....</b>                                                                                           | <b>4</b> |
| <b>Table S4: Protein coding sequences in Ca. Kuenenia stuttgartiensis from RefSeq assembly accension<br/>GCF_900232105.1.....</b>                                                     | <b>4</b> |
| <b>Table S5: calculation of amino acid contribution to biomass in one gram of dry cell weight (DCW).....</b>                                                                          | <b>5</b> |
| <b>Table S6: DNA contribution to the biomass objective function in iRB399 .....</b>                                                                                                   | <b>6</b> |
| <b>Table S7: Ion contribution to the biomass objective function in iRB399 [2]. .....</b>                                                                                              | <b>6</b> |
| <b>Table S8: Lipid profile of an ANAMMOX cell. FA, fatty acid; mE, monoether; diE, diether; Lad.,<br/>ladderane; amxs. Lipid composition of cell wall and anammoxosome [4]. .....</b> | <b>6</b> |
| <b>Table S9: Calculation of lipid contribution to biomass objective function in iRB399. ....</b>                                                                                      | <b>6</b> |
| <b>Table S10: Muropeptide contribution to the biomass objective function determined by mass<br/>spectrometry[5].....</b>                                                              | <b>7</b> |
| <b>Table S11: Standard Gibbs free energy for different metabolic reactions. ....</b>                                                                                                  | <b>7</b> |
| <b>Table S12: Theoretical ATP/e- and H<sup>+</sup>/e- R for Ammonium oxidation and Reduction Coupled electron<br/>transfer chain.....</b>                                             | <b>7</b> |
| <b>Table S13: Theoretical ATP/e- and H<sup>+</sup>/e- for Ammonium oxidation Coupled with Reduction of<br/>Standard Hydrogen Electrode.....</b>                                       | <b>8</b> |
| <b>Table S14: BLAST[9] alignment of important features not initially found using RAST annotation.....</b>                                                                             | <b>8</b> |

## Model Details

**Table S1: General features of iRB399**

|                                                                        |                                  |
|------------------------------------------------------------------------|----------------------------------|
| Genes                                                                  |                                  |
| Total number of protein-coding genes                                   | 1432                             |
| Total number of open reading frames included in the model              | 399                              |
| Genes from <i>Ca. Kuenenia stuttgartiensis</i>                         | 344                              |
| Genes from the rest of the pangenome                                   | 55                               |
| Genes involved in more than one reaction                               | 62                               |
| Genes excluded from the model from <i>Ca. Kuenenia stuttgartiensis</i> | 1173                             |
| Intra-System Reactions                                                 |                                  |
| Total number of model reactions                                        | 408                              |
| Gene-associated reactions                                              | 249                              |
| Non-gene associated reactions                                          | 155                              |
| Exchange reactions                                                     |                                  |
| Total number of exchange reactions                                     | 44                               |
| Input-output reactions                                                 | 407                              |
| Biomass Demand reaction                                                | 1                                |
| KEGG database Metabolites                                              | 386                              |
| Non-KEGG database metabolites                                          | 6 in biomass (#?) intermediaries |
| Total number of metabolites                                            | 416                              |
| Number of Extracellular Metabolites                                    | 33                               |
| Number of Biomass Metabolites                                          | 62                               |
| Reaction sources                                                       |                                  |
| Genome Annotation                                                      | 249                              |
| Gap filling                                                            | 143                              |

**Table S2: MEMOTE[1] report generated from iRB399.**

|                                                 |       |
|-------------------------------------------------|-------|
| Consistency                                     |       |
| Mass Balance                                    | 84.3% |
| Charge Balance                                  | 86.0% |
| Metabolite Connectivity                         | 99.5% |
| Unbounded Flux In Default Medium                | 91.6% |
| Metabolite Information                          |       |
| Unique Metabolites                              | 426   |
| Duplicate Metabolites in Identical Compartments | 2152  |
| Metabolites without charge                      | 0     |
| Metabolites without formula                     | 0     |
| Medium Components                               | 20    |
| Reaction Information                            |       |
| Purely metabolic Reactions                      | 373   |
| Purely Metabolic Reactions with Constraints     | 28    |
| Transport Reactions                             | 48    |
| Transport Reactions with Constraints            | 13    |
| Matrix Conditioning                             |       |

|                                     |     |
|-------------------------------------|-----|
| Ratio Min/Max Non-Zero Coefficients | 0   |
| Independent Conservation Relations  | 28  |
| Rank                                | 398 |
| Degrees Of Freedom                  | 52  |

## Biomass Objective Function

**Table S3: Macromolecular composition of the biomass objective function in iRB399.**

| Metabolite Class     | % w/w composition                                   |
|----------------------|-----------------------------------------------------|
| Protein              | 60.0 <sup>*</sup>                                   |
| DNA                  | 4.03 <sup>*</sup>                                   |
| RNA                  | 5 <sup>*</sup>                                      |
| Lipid                | 12.6 <sup>*</sup> (calculated as what is left over) |
| Ion                  | 3                                                   |
| Metabolites          | 1.94 <sup>**</sup>                                  |
| Cell wall Components | 13.97 <sup>*</sup>                                  |
| Total                | 100                                                 |

<sup>\*</sup>Experimental value <sup>\*</sup>Estimated value <sup>\*\*</sup>composition from *Bacillus Subtillis* [2].

**Table S4: Protein coding sequences in *Ca. Kuenenia stuttgartiensis* from RefSeq assembly accension GCF\_900232105.1.**

| Amino Acid           | Number | %    | Amino Acid       | Number | %    | Amino Acid       | Number | %    |
|----------------------|--------|------|------------------|--------|------|------------------|--------|------|
| A (L-Alanine)        | 74959  | 6.78 | I (L-Isoleucine) | 91053  | 8.24 | R (L-Arginine)   | 52771  | 4.77 |
| C (L-Cysteine)       | 15250  | 1.38 | K (L-Lysine)     | 83949  | 7.60 | S (L-Serine)     | 67585  | 6.12 |
| D (L- Aspartic acid) | 56769  | 5.14 | L (L-Leucine)    | 103050 | 9.32 | T (L-Threonine)  | 59167  | 5.35 |
| E (L- Glutamic acid) | 77305  | 6.99 | M (L-Methionine) | 26989  | 2.44 | V (L-Valine)     | 70747  | 6.40 |
| F (L- Phenylalanine) | 50127  | 4.54 | N (L-Asparagine) | 51548  | 4.66 | W (L-Tryptophan) | 11642  | 1.05 |
| G (Glycine)          | 74657  | 6.76 | P (L-Proline)    | 41157  | 3.72 | Y (L-Tyrosine)   | 39871  | 3.61 |
| H (L-Histidine)      | 23485  | 2.12 | Q (L-Glutamine)  | 33098  | 2.99 |                  |        |      |

The protein dry mass composition of the cell is 60% which corresponds to 50g per litre of biomass [3].

**Table S5: Calculation of amino acid contribution to biomass in one gram of dry cell weight (DCW).**

| Amino acid           | ORF   | prevalence % | MW     | %P*MW   | % (By weight) | mmol/gDCW |
|----------------------|-------|--------------|--------|---------|---------------|-----------|
| A (L-Alanine)        | 74959 | 6.78         | 89.10  | 604.32  | 4.63          | 0.31      |
| C (L-Cysteine)       | 15250 | 1.38         | 121.10 | 167.10  | 1.28          | 0.06      |
| D (L- Aspartic acid) | 56769 | 5.14         | 133.10 | 683.69  | 5.23          | 0.24      |
| E (L- Glutamic acid) | 77305 | 6.99         | 147.10 | 1028.93 | 7.88          | 0.32      |
| F (L- Phenylalanine) | 50127 | 4.54         | 165.20 | 749.29  | 5.74          | 0.21      |
| G (Glycine)          | 74657 | 6.76         | 75.10  | 507.32  | 3.88          | 0.31      |

|                   |         |        |        |          |      |      |
|-------------------|---------|--------|--------|----------|------|------|
| H (L- Histidine)  | 23485   | 2.12   | 155.20 | 329.80   | 2.52 | 0.10 |
| I (L- Isoleucine) | 91053   | 8.24   | 131.20 | 1080.92  | 8.27 | 0.38 |
| K (L- Lysine)     | 83949   | 7.60   | 146.20 | 1110.53  | 8.50 | 0.35 |
| L (L- Leucine)    | 103050  | 9.32   | 131.20 | 1223.35  | 9.36 | 0.43 |
| M (L- Methionine) | 26989   | 2.44   | 149.20 | 364.35   | 2.79 | 0.11 |
| N (L- Asparagine) | 51548   | 4.66   | 132.10 | 616.14   | 4.72 | 0.21 |
| P (L- Proline)    | 41157   | 3.72   | 115.10 | 428.63   | 3.28 | 0.17 |
| Q (L- Glutamine)  | 33098   | 2.99   | 146.10 | 437.54   | 3.35 | 0.14 |
| R (L- Arginine)   | 52771   | 4.77   | 174.20 | 831.78   | 6.37 | 0.22 |
| S (L- Serine)     | 67585   | 6.12   | 105.10 | 642.72   | 4.92 | 0.28 |
| T (L- Threonine)  | 59167   | 5.35   | 119.10 | 637.62   | 4.88 | 0.25 |
| V (L- Valine)     | 70747   | 6.40   | 117.20 | 750.24   | 5.74 | 0.29 |
| W (L- Tryptophan) | 11642   | 1.05   | 204.23 | 215.14   | 1.65 | 0.05 |
| Y (L- Tyrosine)   | 39871   | 3.61   | 181.20 | 653.71   | 5.00 | 0.17 |
|                   | 1105179 | 100.00 |        | 13063.13 |      |      |

**Table S6: DNA contribution to the biomass objective function in iRB399**

| DNA    | Count (all ORFs) | % Prevalence | MW     | %P*MW       | % (By weight) | mmol/gDCW   |
|--------|------------------|--------------|--------|-------------|---------------|-------------|
| dATP   | 1301484          | 0.295        | 487    | 143.9       | 29.8          | 0.01835683  |
| dCTP   | 903309           | 0.205        | 462.99 | 94.9        | 19.7          | 0.012740756 |
| dGTP   | 907153           | 0.206        | 503    | 103.6       | 21.5          | 0.012794974 |
| dTTP   | 1294235          | 0.294        | 477.99 | 140.4       | 29.1          | 0.018254586 |
| Totals | 4406181          | 1            |        | 482.7253099 | 100           |             |

**Table S7: Ion contribution to the biomass objective function in iRB399 [2].**

| Component        | % w/w | MW (g/mol) | g/gDCW   | mmol/gDCW* |
|------------------|-------|------------|----------|------------|
| K <sup>+</sup>   | 86    | 39.1       | 0.0259   | 0.663      |
| Mg <sup>2+</sup> | 7.7   | 24.3       | 0.00232  | 0.956      |
| Fe <sup>3+</sup> | 0.6   | 55.9       | 0.000181 | 0.00323    |
| Ca <sup>2+</sup> | 0.4   | 40.1       | 0.000121 | 0.00301    |
| Phosphate        | 4.3   | 96.0       | 0.00130  | 0.0135     |
| Diphosphate      | 0.5   | 174.9      | 0.000151 | 0.000862   |
| Sum              | 99.5  |            | 0.03     |            |

The overall charge within the cell was made to be neutral according to the law of electroneutrality.

**Table S8: Lipid profile of an ANAMMOX cell. FA, fatty acid; mE, monoether; diE, diether; Lad., ladderane; amxs. Lipid composition of cell wall and anammoxosome [4].**

| Lipids after base hydrolysis | Intact cells | Amxs with riboplasm | Isolated amxs |
|------------------------------|--------------|---------------------|---------------|
| isoC14 FA                    | 1.7          | 1.8                 | 1.8           |
| C14:0 FA                     | 7.4          | 7.8                 | 7.6           |

|                              |      |      |      |
|------------------------------|------|------|------|
| isoC16 FA                    | 3.2  | 2.9  | 3.2  |
| C16:0 FA                     | 12.3 | 10.0 | 12.8 |
| 10MeC16 FA                   | 10.3 | 11.2 | 11.6 |
| C18 lad. FAs                 | 6.4  | 7.3  | 7.7  |
| C20 lad. FAs                 | 15.8 | 17.9 | 17.6 |
| Squalene                     | 2.3  | 2.3  | 2.6  |
| Lad. Glycerol mE             | 29.0 | 29.3 | 27.4 |
| Diplopterol                  | 0.5  | 0.3  | 0.4  |
| isoC14/C20 lad. Glycerol diE | 2.4  | 2.0  | 1.5  |
| C14/C20 lad. Glycerol diE    | 5.2  | 4.5  | 3.3  |
| C16/C20 lad. Glycerol diE    | 2.0  | 2.0  | 1.4  |
| Bacteriohopanetetrol         | 1.5  | 0.7  | 2.1  |

**Table S9: Calculation of lipid contribution to biomass objective function in iRB399.**

| Component                           | Content % | MW (g/mol)                     | g/gDCW<br>(12% of<br>DCW) | μmol/gDCW* |
|-------------------------------------|-----------|--------------------------------|---------------------------|------------|
| isoC14 FA                           | 1.7       | 228.376                        | 0.00214                   | 9.379      |
| C14:0 FA                            | 7.4       | 228.376                        | 0.00932                   | 40.82      |
| isoC16 FA                           | 3.2       | 256.43                         | 0.00403                   | 15.72      |
| C16:0 FA                            | 12.3      | 256.43                         | 0.01550                   | 60.43      |
| 10MeC16 FA                          | 10.3      | 270.5                          | 0.01298                   | 47.98      |
| C18 lad. FAs                        | 6.4       | 274.4                          | 0.00806                   | 29.39      |
| C20 lad. FAs                        | 15.8      | 302.5                          | 0.01991                   | 65.81      |
| Squalene                            | 2.3       | 410.73                         | 0.00290                   | 7.056      |
| Lad. Glycerol mE                    | 29        | 367.58                         | 0.03654                   | 99.41      |
| Diplopterol                         | 0.5       | 428.7                          | 0.00063                   | 1.470      |
| isoC14/C20 lad.<br>Glycerol diE     | 2.4       | 563.58                         | 0.00302                   | 5.362      |
| C14/C20 lad. Glycerol<br>diE        | 5.2       | 563.95                         | 0.00655                   | 11.62      |
| C16/C20 lad. Glycerol<br>diE        | 2         | 592.004                        | 0.00252                   | 4.257      |
| Bacteriohopanetetrol                | 1.5       | 546.86                         | 0.00189                   | 3.456      |
| Bacteriohopanetetrol*<br>(in model) | 1.5       | 428.7 (same as<br>Diplopterol) | 0.00189                   | 4.409      |

\*Bacteriohopanetetrol mass is considered as Diplopterol since the Bacteriohopanetetrol biosynthesis pathway is missing.

**Table S10: Muropeptide contribution to the biomass objective function determined by mass spectrometry[5].**

| Muropeptide | Relative<br>abundance % | [M + H] <sup>+</sup><br>theoretical | [M + H] <sup>+</sup><br>determined | Difference<br>(theo-det) | Basis %<br>corrected<br>abundance | mmol/<br>gDCW |
|-------------|-------------------------|-------------------------------------|------------------------------------|--------------------------|-----------------------------------|---------------|
| M3          | 31.5                    | 871.38                              | 871.37                             | 0.01                     | 47.4                              | 0.759         |
| M4          | 5.8                     | 942.41                              | 942.36                             | 0.05                     | 8.72                              | 0.013         |
| M2          | 6.9                     | 699.29                              | 699.27                             | 0.02                     | 10.4                              | 0.021         |
| D43         | 22.3                    | 1794.77                             | 1794.70                            | 0.07                     | 33.5                              | 0.026         |

|      |      |         |    |   |  |  |
|------|------|---------|----|---|--|--|
| D44* | 5.7  | 1865.81 | ND | - |  |  |
| -*   | 10.1 | -       | ND | - |  |  |

\*The relative abundances do not sum to 100% and the measurement for D44 and the unknown sixth muropeptide cannot be used so only the first four rows on the table are used and normalised.

## Thermodynamic Considerations

**Table S11: Standard Gibbs free energy for different metabolic reactions.**

| Electron donor | Electron acceptor | Product        | Reaction $\Delta G_0'$<br>(kJ/mol) | Reference |
|----------------|-------------------|----------------|------------------------------------|-----------|
| Ammonium       | Nitrite           | N <sub>2</sub> | -358                               | [6]       |
| Ammonium       | Electrode         | N <sub>2</sub> | -173.7                             | [7]       |
| Hydroxylamine  | Hydroxylamine     | N <sub>2</sub> | -227.9                             | [8]       |

**Table S12: Theoretical ATP/e- and H<sup>+</sup>/e- R for Ammonium oxidation and Reduction Coupled electron transfer chain.**

| $\Delta G_0$ | ATP/e- ratio<br>(maximum) | Proton<br>translocation/mole<br>ATP | H <sup>+</sup> /e <sup>-</sup> ratio |         | Assumed<br>Energy transfer<br>efficiency (%) | ATP/e-<br>(Assumed) |
|--------------|---------------------------|-------------------------------------|--------------------------------------|---------|----------------------------------------------|---------------------|
|              |                           |                                     | Max                                  | Assumed |                                              |                     |
| -358         | 1.81                      | 4                                   | 5.43                                 | 6       | 100                                          | 1.50                |
|              |                           |                                     |                                      | 5       | 83.3                                         | 1.25                |
|              |                           |                                     |                                      | 4       | 66.7                                         | 1.00                |
|              |                           |                                     |                                      | 3       | 50                                           | 0.75                |
|              |                           |                                     |                                      | 2       | 33.3                                         | 0.50                |
|              |                           |                                     |                                      | 1       | 16.7                                         | 0.25                |

**Table S13: Theoretical ATP/e- and H<sup>+</sup>/e- for Ammonium oxidation Coupled with Reduction of Standard Hydrogen Electrode.**

| $\Delta G_0$ | ATP/e- ratio<br>(maximum) | Proton<br>translocation/mole<br>ATP | H <sup>+</sup> /e <sup>-</sup> ratio |         | Assumed<br>Energy transfer<br>efficiency (%) | ATP/e-<br>(Assumed) |
|--------------|---------------------------|-------------------------------------|--------------------------------------|---------|----------------------------------------------|---------------------|
|              |                           |                                     | Max                                  | Assumed |                                              |                     |
| -173         | 1.17                      | 4                                   | 3.51                                 | 4       | 100                                          | 1.00                |
|              |                           |                                     |                                      | 3       | 75                                           | 0.75                |
|              |                           |                                     |                                      | 2       | 50                                           | 0.50                |
|              |                           |                                     |                                      | 1       | 25                                           | 0.25                |

## Gap Filling

Some subsystems in the ANAMMOX metabolism had very poor annotation and required gapfilling and further investigation to ensure their functionality. The following table contains some of this information for the genes which were investigated.

**Table S14: BLAST[9] alignment of important features not initially found using RAST annotation.**

| Enzyme                                   | Subunit | Feature ID     | Closest UniProtKB/ Swiss-Prot (swissprot) BLAST result (%identity) | e-Value | Closest non ANAMMOX Non-redundant Protein sequence (nr) database result (%identity) | e-Value |
|------------------------------------------|---------|----------------|--------------------------------------------------------------------|---------|-------------------------------------------------------------------------------------|---------|
| <b>Reverse TCA specific genes</b>        |         |                |                                                                    |         |                                                                                     |         |
| Succinate dehydrogenase (quinol) 1.3.5.1 | SdhA*   |                |                                                                    |         |                                                                                     |         |
|                                          | SdhB    | KsCSTR_RS00725 | Succinate dehydrogenase [ubiquinone] iron-sulfur                   | 1e-61   | Succinate dehydrogenase iron-sulfur subunit [Candidatus]                            | 2e-99   |



|                                                      |              |                |                                                                                                             |        |                                                                                                          |        |
|------------------------------------------------------|--------------|----------------|-------------------------------------------------------------------------------------------------------------|--------|----------------------------------------------------------------------------------------------------------|--------|
|                                                      |              |                | subunit 2 Arabidopsis thaliana Q8LB02.2 (44.05%)                                                            |        | Marinimicrobia bacterium] 56.47%                                                                         |        |
|                                                      | SdhC         | KsCSTR_RS18490 | Succinate dehydrogenase 2 membrane subunit SdhC [Mycobacterium tuberculosis] (28.46%)                       | 5e-09  | Succinate dehydrogenase 2 membrane subunit SdhC [Candidatus Marinimicrobia bacterium] (48.21%)           | 9e-29  |
|                                                      | SdhD*        |                |                                                                                                             |        |                                                                                                          |        |
| 2-oxoglutarate synthase ec: 1.2.7.3-                 | KorA         | KsCSTR_RS00370 | 2-oxoglutarate synthase subunit KorA [Archaeoglobus fulgidus] (36.52%)                                      | 2e-61  | 3-methyl-2-oxobutanoate dehydrogenase subunit VorB [Anaerobranca californiensis] WP_072905739.1 (61.10%) | 2e-154 |
|                                                      | KorB         | KsCSTR_RS00365 | 2-oxoglutarate-ferredoxin oxidoreductase subunit beta [Methanocaldococcus jannaschii DSM 2661] (38.54%)     | 2e-39  | Might have different name in database (oxoglutarate oxidoreductase)                                      |        |
| <b>Gluconeogenesis specific genes</b>                |              |                |                                                                                                             |        |                                                                                                          |        |
| Pyruvate carboxylase ec:6.4.1.1                      | Single gene  | KsCSTR_RS04340 | Pyruvate carboxylase [Bacillus subtilis subsp. subtilis str. 168] Q9KWU4.1 (54.07%)                         | 0.0    | pyruvate carboxylase [Lentisphaera araneosa] WP_040914872.1 (65.80%)                                     | 0.0    |
| Phosphoenolpyruvate carboxykinase (ATP) ec:4.1.1.49- | Single gene  | KsCSTR_RS12330 | Phosphoenolpyruvate carboxykinase (ATP) [Aeropyrum pernix K1] Q9YG68.2 (32.12%)                             | 1e-58  | TPA: phosphoenolpyruvate carboxykinase [Armatimonadetes bacterium] HHA15313.1 (57.06%)                   | 0.0    |
| fructose 1,6-bisphosphatase class 1 ec:3.1.3.11-     | Single gene  | KsCSTR_RS04100 | Fructose-1,6-bisphosphatase class 1 [Chloroherpeton thalassium ATCC 35110] B3QWF5.1 (62.84%)                | 2e-146 | fructose-1,6-bisphosphatase [Desulfovibrio magneticus str. Maddingley MBC34] EKO40391.1 (61.73%)         | 1e-141 |
| glucose 6-phosphatase*                               |              |                |                                                                                                             |        |                                                                                                          |        |
|                                                      |              |                |                                                                                                             |        |                                                                                                          |        |
| Anaerobic carbon-monoxide dehydrogenase ec:1.2.7.4   | Alpha copy 1 | KsCSTR_RS03835 | Carbon monoxide dehydrogenase 1 [Methanosarcina acetivorans C2A] Q8TKW2.1 (48.56%)                          | 0.0    |                                                                                                          |        |
|                                                      | Alpha copy 2 | KsCSTR_RS11645 | Carbon monoxide dehydrogenase 1; Short=CODH 1 [Carboxydotherrmus hydrogenoformans Z-2901] P59934.3 (42.68%) | 1e-166 |                                                                                                          |        |

|                                                                                              |                                  |                |                                                                                                                        |        |                                                                                                                        |        |
|----------------------------------------------------------------------------------------------|----------------------------------|----------------|------------------------------------------------------------------------------------------------------------------------|--------|------------------------------------------------------------------------------------------------------------------------|--------|
| CO-methylating acetyl-CoA synthase<br>ec:2.3.1.169-                                          | Alpha                            | KsCSTR_RS03840 | Carbon monoxide dehydrogenase/acetyl-CoA synthase subunit alpha [Moorella thermoacetica] P27988.1 (46.56%)             | 0.0    | CO dehydrogenase/CO-methylating acetyl-CoA synthase complex subunit beta [Deferriusoma camini] WP_025323519.1 (63.13%) | 0.0    |
| 5-methyltetrahydrofolate:corrinoid/iron-sulfur protein Co-methyltransferase<br>ec:2.1.1.258- |                                  | KsCSTR_RS03870 | 5-methyltetrahydrofolate:corrinoid/iron-sulfur protein Co-methyltransferase [Moorella thermoacetica] Q46389.2 (45.00%) | 5e-82  | methyltetrahydrofolate cobalamin methyltransferase [Acetohalobium arabaticum] WP_013278258.1 (47.89%)                  | 8e-85  |
|                                                                                              | small subunit (probably related) | KsCSTR_RS03865 | Corrinoid/iron-sulfur protein small subunit [Moorella thermoacetica] Q07341.2 (51.26%)                                 | 3e-111 | acetyl-CoA decarbonylase/synthase complex subunit delta [Sporomusa acidovorans] WP_094607893.1 (53.23%)                | 3e-118 |
|                                                                                              | large subunit (probably related) | KsCSTR_RS03850 | Corrinoid/iron-sulfur protein large subunit; Short=C/Fe-SP large subunit [Moorella thermoacetica] Q07340.2 (46.26%)    | 3e-132 | acetyl-CoA decarbonylase/synthase complex subunit gamma [Thermodesulfotimonas autotrophica] WP_123928501.1 (52.48%)    | 3e-159 |
|                                                                                              |                                  |                |                                                                                                                        |        |                                                                                                                        |        |
|                                                                                              |                                  |                |                                                                                                                        |        |                                                                                                                        |        |
| <b>Sulphur Metabolism</b>                                                                    |                                  |                |                                                                                                                        |        |                                                                                                                        |        |
| Sulfate adenylyltransferase<br>ec:2.7.7.4-                                                   |                                  | KsCSTR_RS08580 | Sulfate adenylyltransferase B8D0S5.1 [Halothermothrix orenii H 168] (60.94%)                                           | 4e-173 |                                                                                                                        |        |
| Adenylyl-sulfate kinase<br>ec:2.7.1.25                                                       | Copy 1                           | KsCSTR_RS04455 | Adenylyl-sulfate kinase Q4L9E6.1 [Staphylococcus haemolyticus JCSC1435] (62.83%)                                       | 5e-87  |                                                                                                                        |        |
|                                                                                              | Copy 2                           | KsCSTR_RS10510 | Adenylyl-sulfate kinase B7K5B1.1 [Rippkaea orientalis PCC 8801] (46.93%)                                               | 6e-52  |                                                                                                                        |        |
| Phosphoadenylyl-sulfate reductase (thioredoxin)<br>ec:1.8.4.8                                |                                  | KsCSTR_RS10955 | Adenosine 5'-phosphosulfate reductase A0R0W2.1 [Mycobacterium smegmatis MC2 155] (35.51%)                              | 6e-42  |                                                                                                                        |        |
| 1.12.98.4 Anaerobic sulfite reductase subunit A                                              |                                  | KsCSTR_RS11265 | Sulfhydrogenase 1 subunit beta Q8U2E5.1 [Pyrococcus furiosus DSM 3638] (35.29%)                                        | 1e-63  |                                                                                                                        |        |
|                                                                                              |                                  |                |                                                                                                                        |        |                                                                                                                        |        |

| Amino Acid Metabolism                            |  |                |                                                                          |        |  |  |
|--------------------------------------------------|--|----------------|--------------------------------------------------------------------------|--------|--|--|
| ec:4.3.1.1-Aspartate ammonia-lyase.              |  | KsCSTR_RS01220 | Aspartate ammonia-lyase; Short=Aspartase [Helicobacter pylori J99] (49%) | 6e-144 |  |  |
| ec:2.6.1.83-LL-diaminopimelate aminotransferase. |  | KsCSTR_RS09610 | LL-diaminopimelate aminotransferase [Thermodesulfatator indicus] (48%)   | 8e-103 |  |  |

## Nucleic Acids

In the ModelSEED system the RNA and DNA in the cell have their own ID (cpd17043[c0] and cpd17042[c0]) respectively. The relative molar amounts of each in the genome are used to create the following chemical reactions:

RNA Synthesis:

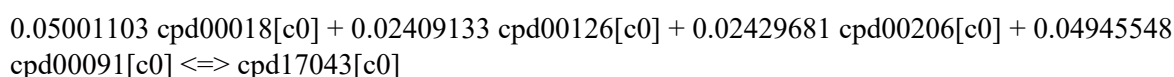

DNA Synthesis:

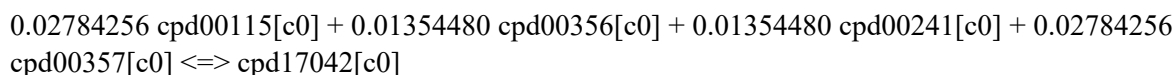

## Ladderanes

Since there is no established pathway for glycerol ether ladderanes their biosynthesis is modelled after an established diether biosynthetic pathway [10]. Bacteriohopanetetrol also did not appear to have a well-established biosynthesis so it was considered as identical to diplopterol in the model's biomass.

It is generally understood that ladderanes are derived from fatty acids with the same number of carbon atoms and somehow rearranged and dehydrated. The carrier for the hydrogen resulting from dehydrogenation has not been confirmed but it is likely flavin adenine dinucleotide (FAD) which can accept  $2\text{H}^+$  and  $2\text{e}^-$  to become FADH.

Two ladderane fatty acids need to be synthesised for this model: C18 and C20 ladderane:

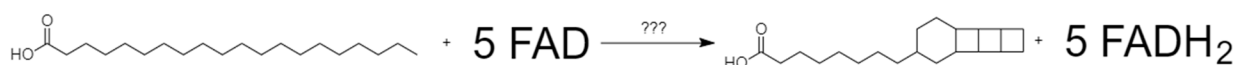

**Figure S1: hypothetical ladderane synthesis from C20:0 fatty acid.**

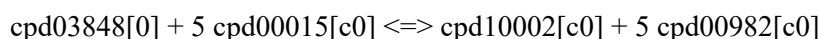

It is recognised that this is an approximation for this reaction since there isn't firm proof for how the biosynthesis takes place *in vivo*.

## Cell Wall Components

Page 123 of physiology of the bacterial cell by F.Niedhart [11] describes typical needs for a gram of biomass cell wall to be made. The example pathway used to gapfill the biosynthesis of mucopeptides is found in the Metacyc database [12] "peptidoglycan biosynthesis I (meso-diaminopimelate containing)".

## Calculation of *Ca. Kuenenia stuttgartiensis* Cell Composition

The shape of *K. stuttgartiensis* cell is reported as spherical.

The diameter of a *K. Stuttgartiensis* Cell is on average  $0.8\mu\text{m}$  [13]

The volume of one *K. Stuttgartiensis* cell is:  $\frac{4}{3}\pi r^3 = \frac{1}{6}\pi D^3 = \frac{1}{6} \times \pi \times (0.8)^3 = 0.268\mu\text{m}^3$

*E.coli*, also a gram negative bacterium, generally have a density of  $1.1\text{ g/ml}$  [14].

The mass of one cell is therefore  $1.1\text{ g/ml} \times 0.268\mu\text{m}^3 \times 10^{-12}\text{ml}\mu\text{m}^{-3} = 2.95 \times 10^{-13}\text{g}$

Typically, a bacterial cell is 70% water by mass, so the dry mass of a cell is:

$$\frac{2.95 \times 10^{-13}}{1-0.7} = 8.847 \times 10^{-13}\text{g}$$

The dry mass percentage composition of DNA is therefore the total mass of a chromosome divided by the dry mass of a cell:

$$\frac{\frac{\text{Nucleotide count} \times \text{Molecular weights}}{\text{single cell dry mass} \times \text{Avogadro's number}}}{1297860 \times 491.2 + 905231 \times 467.2 + 905231 \times 507.2 + 1297860 \times 482.2} = 0.0403 = 4.03\%$$

$$\frac{1297860 \times 491.2 + 905231 \times 467.2 + 905231 \times 507.2 + 1297860 \times 482.2}{8.847 \times 10^{-13} \times 6.022 \times 10^{23}}$$

### Electron Transport chain

The electron transport chain has previously been described and contains respiratory complexes I, II, III and IV [15]. Simulations using electron transport chain setup as previously described[15] did not function correctly as they produced thermodynamically unfeasible cycles when oxidising nitrite to nitrate.

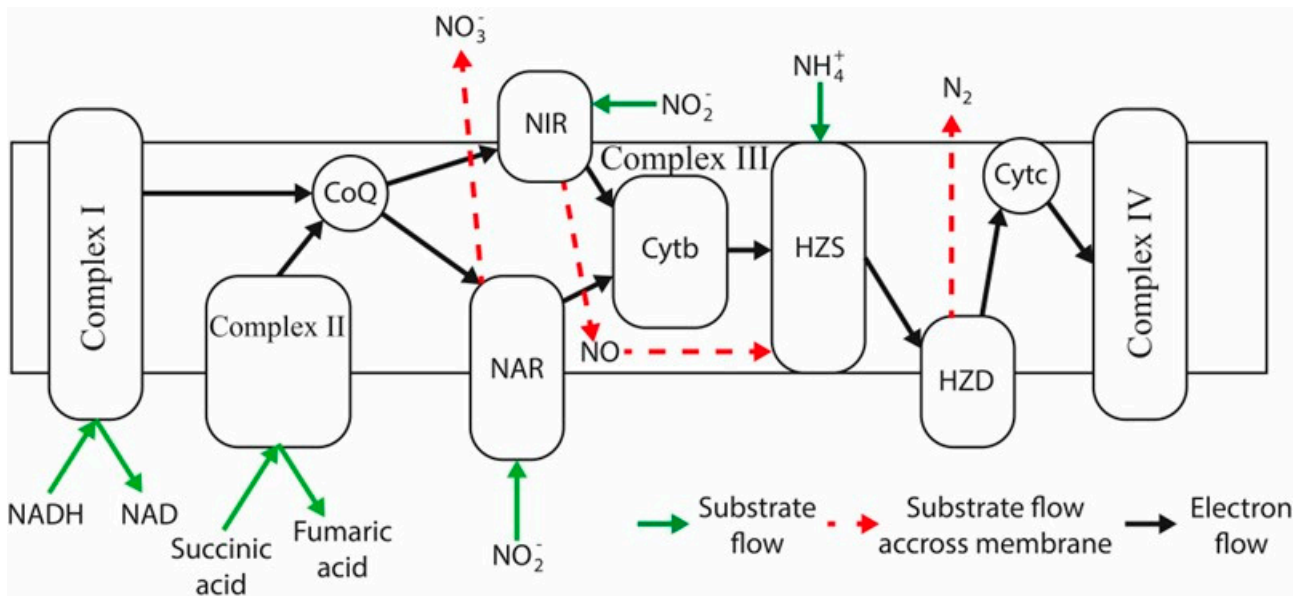

**Figure S2:iRB399 reconstruction of the electron transport chain [15]**

Here the NAR enzyme is problematic since it isn't entirely clear how this should function in the metabolic model. The original proposition was that it is used in carbon fixation but this cannot be true since it is thermodynamically unfeasible. Furthermore, ANAMMOX have been shown to grow in absence of nitrite and using nitric oxide as a sole electron acceptor and without producing nitrate[16]. Therefore, it is more likely that something else is taking place.

### Calculation of Maximum Energy Transfer Efficiency (ATP/e<sup>-</sup>) and Proton Translocation Stoichiometry (H<sup>+</sup>/e<sup>-</sup> ratio) of *Ca. Kuenenia Stuttgartiensis* Electron Transport Chain.

The theoretical maximum ATP/e<sup>-</sup> ratio, ( $\eta_{ATP/\eta_e}$ )<sub>max</sub> can be determined from the following equation [17]:

$$(\eta_{ATP/\eta_e})_{max} = \frac{\Delta E_0' F}{\Delta G_p'} \quad (S1)$$

Where F is the Faraday constant (96,500 J/mol .V),  $\Delta E_0'$  is the difference in standard redox potential between the electron donor and acceptor and  $\Delta G_p'$  is the free energy of phosphorylation reaction at pH 7 and physiological condition.

$$\text{Since } \Delta G_0' = -nF\Delta E_0'$$

$$\text{Therefore, } (\eta_{ATP/\eta_e})_{max} = \frac{\Delta G_0' F}{n\Delta G_p'} \quad (S2)$$

Where n is the number of electrons transferred in the reaction.

$\Delta G_p'$  at physiological conditions can be calculated from the free energy of the phosphorylation reaction at standard conditions and pH 7 ( $\Delta G_{0,p}$ ) using the following equation:

$$\Delta G_p' = \Delta G_0' + RT \ln \left( \frac{[ATP]}{[ADP][P_i]} \right) \quad (S3)$$

Where,  $\Delta G_{0,p}' = 32$  kJ/mol [18], R is the universal gas constant having a value of 8.314 J/mol.K and T is the absolute temperature, 310.15K at 37°C which is the temperature GAM was measured at[19].

Assuming that the concentrations of ATP and ADP are equal, and that the concentration of P<sub>i</sub> is 1 mM, then the calculated value of  $\Delta G_p'$  using equation (S3) is 49.46 kJ/mol.

The average standard free energy for the nitrite and ammonium ANAMMOX reaction is  $\Delta G_0' = -358$  kJ/mol (Table S11).

Therefore, theoretical maximum ATP/e<sup>-</sup> using equation (S2) is:

$$(\eta_{ATP/\eta_e})_{max} = \frac{358}{4 \times 49.46} = 1.81$$

Assuming the number of H<sup>+</sup> translocated across the membrane during the phosphorylation of ADP is 4, we obtain the theoretical maximum H<sup>+</sup>/e<sup>-</sup> is 5.43. Referring to Table S12 this means the H<sup>+</sup>/e<sup>-</sup> ratio can be either 5 or 6. This means the process can have a theoretical efficiency of 83.3% however this is uncharacteristic of anaerobes and when applied to the model results in GAM being much higher than anything reported in literature. A thermodynamic efficiency of 16.7% and a H<sup>+</sup>/e<sup>-</sup> ratio of 1 is chosen.

Since the ATP/e<sup>-</sup> value (0.25) corresponds to 1 H<sup>+</sup>/e<sup>-</sup> this means that 1 mole of NH<sub>3</sub> consumed with nitrite as the electron sink corresponds to 1.20 ATP/NH<sub>3</sub> and depending on efficiency might be as high as 7.24. When considering transportation costs and that in the cell this figure becomes 0.75 since nitrite is transported into the cell via proton symport.

For EET this is calculated using the half equation using only ammonium:

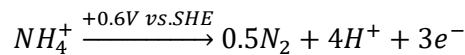

Now Gibbs free energy can be calculated:

$$\Delta G_0' = -nF\Delta E_0'$$

$$\Delta G_0' = -3 \times 96,500 \times 0.6 = -173.700 \text{ KJ/mol}$$

Now to calculate the maximum amount of ATP that can be derived from those electrons:

$$(\eta_{ATP}/\eta_e)_{max} = \frac{173.7}{3 \times 49.46} = 1.171$$

Assuming the number of H<sup>+</sup> translocated across the membrane during the phosphorylation of ADP is 3, the theoretical maximum H<sup>+</sup>/e<sup>-</sup> is 3.51. Referring to Table S13 this means the H<sup>+</sup>/e<sup>-</sup> ratio should be either 2 or 3. This means the process can have a theoretical efficiency of 75% however this is uncharacteristic of anaerobes so 25% efficiency is chosen at a H<sup>+</sup>/e<sup>-</sup> ratio of 1.

### Calculation of GAM and NGAM

Non-Growth Associated Maintenance energy for *K. Stuttgartiensis* is likely to be very similar to that of *Ca. Broccadia Sinica*. The intercept on the Y axis is the amount of NH<sub>4</sub> required for maintenance in terms of NH<sub>4</sub> per unit protein. This can be converted to consumption of NH<sub>4</sub> per unit biomass and since the electron transport chain has an efficiency of 0.75 ATP/NH<sub>4</sub> consumed the NGAM is calculated as:

$$NGAM = 1.26 \times 0.6 \times 0.75 = 0.5625 \text{ mmol ATP (g.DCW)}^{-1} \text{ h}^{-1}$$

For another species of ANAMMOX bacteria, “Ca. Scalindua sp.” NGAM was measured as 0.8255 mmol NH<sub>4</sub><sup>+</sup> g-protein<sup>-1</sup> h<sup>-1</sup> [19]. Since the cell has a mass fraction of 0.6 g.protein/g.biomass the consumption of NH<sub>4</sub><sup>+</sup> per gram of biomass is:

$$NGAM = 0.8255 \times 0.6 \times 0.75 = 0.3714 \text{ mmol ATP (g.DCW)}^{-1} \text{ h}^{-1}$$

Since ATP is produced at a rate of 0.75 ATP/NH<sub>3</sub> the maintenance energy (NGAM) is therefore:

$$2.1 \times 1.82 = 3.82 \pm 0.21 \text{ mmol ATP g.biomass}^{-1} \text{ h}^{-1}$$

In iRB399 the NGAM is kept as the lower figure, 0.3714 and the NGAM reaction is:

The specific uptake of ammonia of an ANAMMOX species, *Ca. Broccadia sinica* has been previously determined as is 990.05 NH<sub>4</sub><sup>+</sup> g-protein<sup>-1</sup> h<sup>-1</sup> [19]. By adjusting the GAM in iRB399 to achieve this relationship the GAM was found to be 363.27 ATP/g-biomass.

### iRB399 Biomass Equation

$$\begin{aligned} &0.31152673 \text{ cpd00035[c0]} + 0.06337841 \text{ cpd00084[c0]} + 0.23592979 \text{ cpd00041[c0]} + 0.32127661 \\ &\text{cpd00023[c0]} + 0.20832589 \text{ cpd00066[c0]} + 0.31027163 \text{ cpd00033[c0]} + 0.09760276 \\ &\text{cpd00119[c0]} + 0.37841277 \text{ cpd00322[c0]} + 0.34888882 \text{ cpd00039[c0]} + 0.42827185 \\ &\text{cpd00107[c0]} + 0.11216525 \text{ cpd00060[c0]} + 0.21423151 \text{ cpd00132[c0]} + 0.17104691 \\ &\text{cpd00129[c0]} + 0.13755402 \text{ cpd00053[c0]} + 0.21931425 \text{ cpd00051[c0]} + 0.28088067 \\ &\text{cpd00054[c0]} + 0.24589578 \text{ cpd00161[c0]} + 0.29402182 \text{ cpd00156[c0]} + 0.04838371 \\ &\text{cpd00065[c0]} + 0.16570235 \text{ cpd00069[c0]} + 1.00000000 \text{ cpd17042[c0]} + 1.00000000 \\ &\text{cpd11613[c0]} + 0.009379269 \text{ cpd15599b[c0]} + 0.040827407 \text{ cpd03847[c0]} + 0.015723589 \\ &\text{cpd15599[c0]} + 0.060437546 \text{ cpd00214[c0]} + 0.047977819 \text{ cpd15599[c0]} + 0.029387755 \\ &\text{cpd01080[c0]} + 0.06581157 \text{ cpd10002[c0]} + 0.00705573 \text{ cpd00559[c0]} + 0.099406932 \\ &\text{cpd05269a[c0]} + 0.001469559 \text{ cpd03750[c0]} + 0.005362177 \text{ cpd05269b[c0]} + 0.011618051 \\ &\text{cpd05269c[c0]} + 0.004256728 \text{ cpd05269d[c0]} + 0.004408677 \text{ cpd03750[c0]} + 0.075941247 \\ &\text{cpdM3[c0]} + 0.012928938 \text{ cpdM4[c0]} + 0.020728436 \text{ cpdM2[c0]} + 0.026101822 \text{ cpdD43[c0]} + \\ &0.663162359 \text{ cpd00205[c0]} + 0.095539426 \text{ cpd00254[c0]} + 0.003236217 \text{ cpd10516[c0]} + \\ &0.003007556 \text{ cpd00063[c0]} + 0.013505025 \text{ cpd00009[c0]} + 0.000861943 \text{ cpd00012[c0]} + \\ &0.000194986 \text{ cpd15499[c0]} + 0.000296988 \text{ cpd00201[c0]} + 0.013082729 \text{ cpd00003[c0]} + \\ &0.003771727 \text{ cpd00018[c0]} + 0.002420509 \text{ cpd00002[c0]} + 0.002079208 \text{ cpd00008[c0]} + \\ &0.000564756 \text{ cpd00046[c0]} + 0.000756348 \text{ cpd00006[c0]} + 0.000438322 \text{ cpd00052[c0]} + \\ &0.000447674 \text{ cpd00126[c0]} + 0.000350607 \text{ cpd00038[c0]} + 0.000209895 \text{ cpd00096[c0]} + \end{aligned}$$

0.000169949 cpd00005[c0] + 0.000159019 cpd00031[c0] + 363.27 cpd00002[c0] + 363.27 cpd00001[c0] <=> 363.27 cpd00008[c0] + 363.27 cpd00009[c0] + 363.27 cpd00067[c0]

## Programs

The programs written to carry out the figure creation and analysis in this paper can be found at:

[https://github.com/rmnsgt/metabolic\\_modelling.git](https://github.com/rmnsgt/metabolic_modelling.git)

Instructions for using the programs are also included in the descriptions for each program and further details are included in the comments of the program for spaces that require input.

## Bibliography

1. Lieven, C.; Beber, M.E.; Olivier, B.G.; Bergmann, F.T.; Ataman, M.; Babaei, P.; Bartell, J.A.; Blank, L.M.; Chauhan, S.; Correia, K.; et al. MEMOTE for Standardized Genome-Scale Metabolic Model Testing. *Nature Biotechnology* **2020**, *38*, 272–276, doi:10.1038/s41587-020-0446-y.
2. Soga, T.; Ohashi, Y.; Ueno, Y.; Naraoka, H.; Tomita, M.; Nishioka, T. Quantitative Metabolome Analysis Using Capillary Electrophoresis Mass Spectrometry. *Journal of Proteome Research* **2003**, *2*, 488–494, doi:10.1021/pr034020m.
3. Strous, M.; Kuenen, J.G.; Jetten, M.S.M. Key Physiology of Anaerobic Ammonium Oxidation. *Applied and Environmental Microbiology* **1999**, *65*, 3248–3250, doi:10.1128/aem.65.7.3248-3250.1999.
4. Neumann, S.; Wessels, H.J.C.T.; Rijpstra, W.I.C.; Sinninghe Damsté, J.S.; Kartal, B.; Jetten, M.S.M.; van Niftrik, L. Isolation and Characterization of a Prokaryotic Cell Organelle from the Anammox Bacterium *Kuenenia stuttgartiensis*. *Molecular Microbiology* **2014**, *94*, 794–802, doi:10.1111/mmi.12816.
5. Van Teeseling, M.C.F.; Mesman, R.J.; Kuru, E.; Espallat, A.; Cava, F.; Brun, Y.V.; Vannieuwenhze, M.S.; Kartal, B.; Van Niftrik, L. Anammox Planctomycetes Have a Peptidoglycan Cell Wall. *Nature Communications* **2015**, *6*, 6878, doi:10.1038/ncomms7878.
6. In 't Zandt, M.H.; De Jong, A.E.E.; Slomp, C.P.; Jetten, M.S.M. The Hunt for the Most-Wanted Chemolithoautotrophic Spookmicrobes. *FEMS Microbiology Ecology* **2020**, *94*, fiy064, doi:10.1093/femsec/fiy064.
7. Shaw, D.R.; Ali, M.; Katuri, K.P.; Gralnick, J.A.; Reimann, J.; Mesman, R.; van Niftrik, L.; Jetten, M.S.M.; Saikaly, P.E. Extracellular Electron Transfer-Dependent Anaerobic Oxidation of Ammonium by Anammox Bacteria. *Nature Communications* **2020**, *11*, 2058, doi:10.1038/s41467-020-16016-y.
8. Oshiki, M.; Ali, M.; Shinyako-Hata, K.; Satoh, H.; Okabe, S. Hydroxylamine-Dependent Anaerobic Ammonium Oxidation (Anammox) by “Candidatus Brocadia sinica.” *Environmental microbiology* **2016**, *18*, 3133–3143, doi:10.1111/1462-2920.13355.
9. Altschul, S.F.; Gish, W.; Miller, W.; Myers, E.W.; Lipman, D.J. Basic Local Alignment Search Tool. *Journal of Molecular Biology* **1990**, *215*, doi:10.1016/S0022-2836(05)80360-2.
10. Magnusson, C.D.; Haraldsson, G.G. Ether Lipids. *Chemistry and Physics of Lipids* **2011**, *164*, 315–340, doi:10.1016/j.chemphyslip.2011.04.010.
11. Neidhardt, F.C.; Ingraham, J.L.; Schaechter, M. *Physiology of the Bacterial Cell. A Molecular Approach*; 1992; Vol. 20;.
12. Caspi, R.; Altman, T.; Billington, R.; Dreher, K.; Foerster, H.; Fulcher, C.A.; Holland, T.A.; Keseler, I.M.; Kothari, A.; Kubo, A.; et al. The MetaCyc Database of Metabolic Pathways and Enzymes and the BioCyc Collection of Pathway/Genome Databases. *Nucl. Acids Res.* **2014**, *42*, D459–D471, doi:10.1093/nar/gkt1103.
13. Van Niftrik, L.; Geerts, W.J.C.; Van Donselaar, E.G.; Humbel, B.M.; Webb, R.I.; Fuerst, J.A.; Verkleij, A.J.; Jetten, M.S.M.; Strous, M. Linking Ultrastructure and Function in Four Genera

- of Anaerobic Ammonium-Oxidizing Bacteria: Cell Plan, Glycogen Storage, and Localization of Cytochrome c Proteins. *Journal of Bacteriology* **2008**, *190*, 708–717, doi:10.1128/JB.01449-07.
14. Lewis, C.L.; Craig, C.C.; Senecal, A.G. Mass and Density Measurements of Live and Dead Gram-Negative and Gram-Positive Bacterial Populations. *Applied and Environmental Microbiology* **2014**, *80*, 3622–3631, doi:10.1128/AEM.00117-14.
  15. Wang, S.; Guo, J.; Lian, J.; Ngo, H.H.; Guo, W.; Liu, Y.; Song, Y. Rapid Start-up of the Anammox Process by Denitrifying Granular Sludge and the Mechanism of the Anammox Electron Transport Chain. *Biochemical Engineering Journal* **2016**, *115*, 101–107, doi:10.1016/j.bej.2016.09.001.
  16. Hu, Z.; Wessels, H.J.C.T.; van Alen, T.; Jetten, M.S.M.; Kartal, B. Nitric Oxide-Dependent Anaerobic Ammonium Oxidation. *Nature Communications* **2019**, *10*, 1244, doi:10.1038/s41467-019-09268-w.
  17. Kröger, A.; Biel, S.; Simon, J.; Gross, R.; Uden, G.; Lancaster, C.R.D. Fumarate Respiration of *Wolinella Succinogenes*: Enzymology, Energetics and Coupling Mechanism. *Biochimica et Biophysica Acta - Bioenergetics* **2002**, *1553*, 23–38, doi:10.1016/S0005-2728(01)00234-1.
  18. Thauer, R.K.; Jungermann, K.; Decker, K. Energy Conservation in Chemotrophic Anaerobic Bacteria. *Bacteriological Reviews* **1977**, *41*, 100–180, doi:10.1128/mmbr.41.1.100-180.1977.
  19. Okabe, S.; Kamigaito, A.; Kobayashi, K. Maintenance Power Requirements of Anammox Bacteria “*Candidatus Brocadia Sinica*” and “*Candidatus Scalindua Sp.*” *ISME Journal* **2021**, 3566–3575, doi:10.1038/s41396-021-01031-8.
